# Supplementary material for: Burkholderia pseudomallei type III secreted protein BipC: role in actin modulation and translocation activities required for the bacterial intracellular lifecycle
Source: PubMed Central journal article supplement (PMC5180589; doi:10.7717/peerj.2532), 2016-12-21

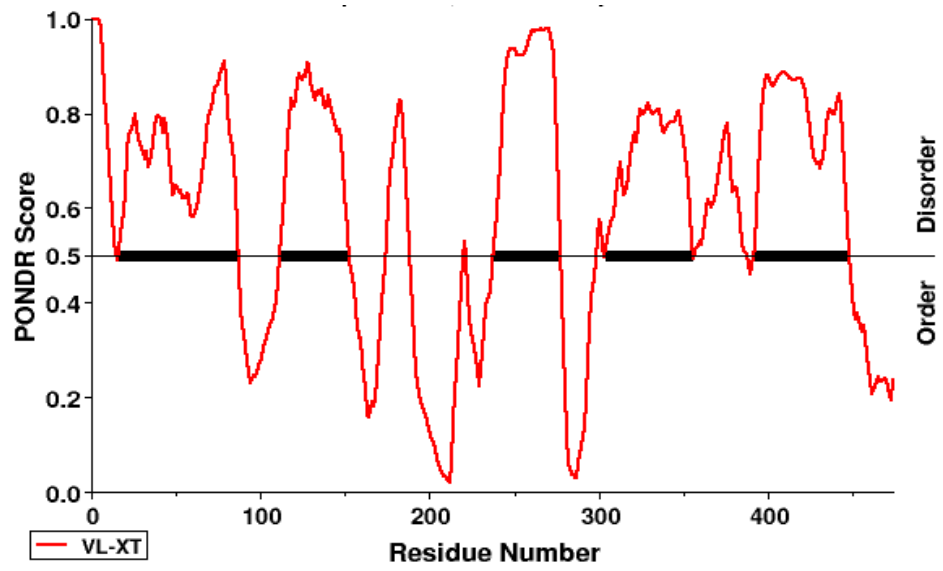

Supplement: peerj-04-2532-s002.pdf [file peerj-04-2532-s002.pdf]
